# Supplementary material for: Fuzzy species among recombinogenic bacteria
Source: Springer Nature journal article supplement (doi:10.1186/1741-7007-3-6), 2005-03-07
Supplement: 12915_2005_34_MOESM2_ESM.pdf [file 12915_2005_34_MOESM2_ESM.pdf]

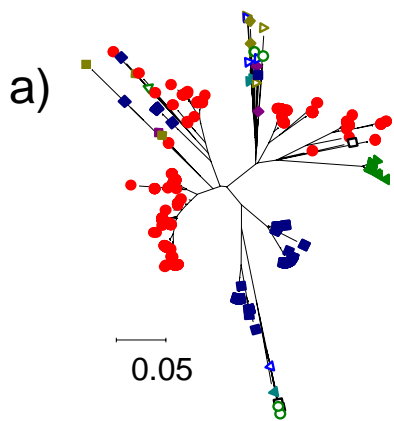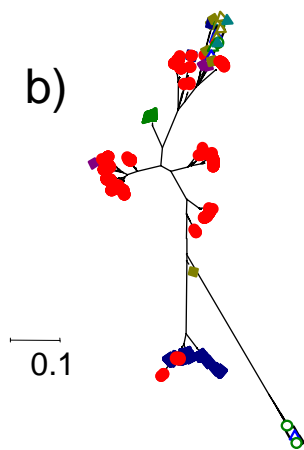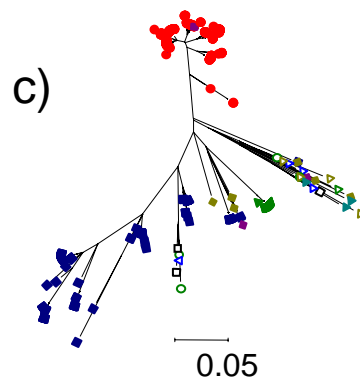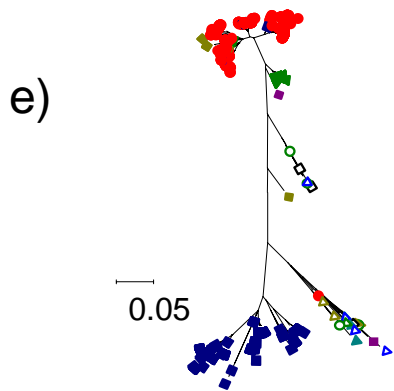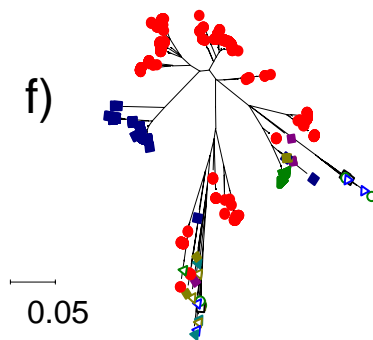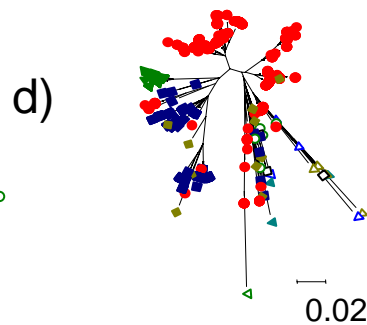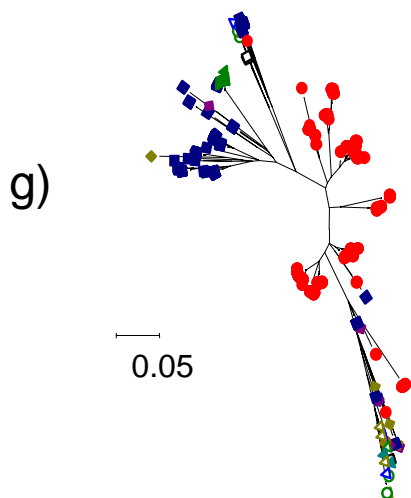

- *N. meningitidis*
- *N. lactamica*
- ▲ *N. gonorrhoeae*
- ◆ *N. cinerea*
- ◇ *N. polysaccharae*
- ▼ *N. flava*
- ▽ *N. perflava*
- ▽ *N. subflava*
- ▽ *N. flavescens*
- *N. sicca*
- *N. mucosa*
