# Supplementary figures and images for: Fuzzy species among recombinogenic bacteria
Source: Springer Nature journal article supplement (doi:10.1186/1741-7007-3-6), 2005-03-07

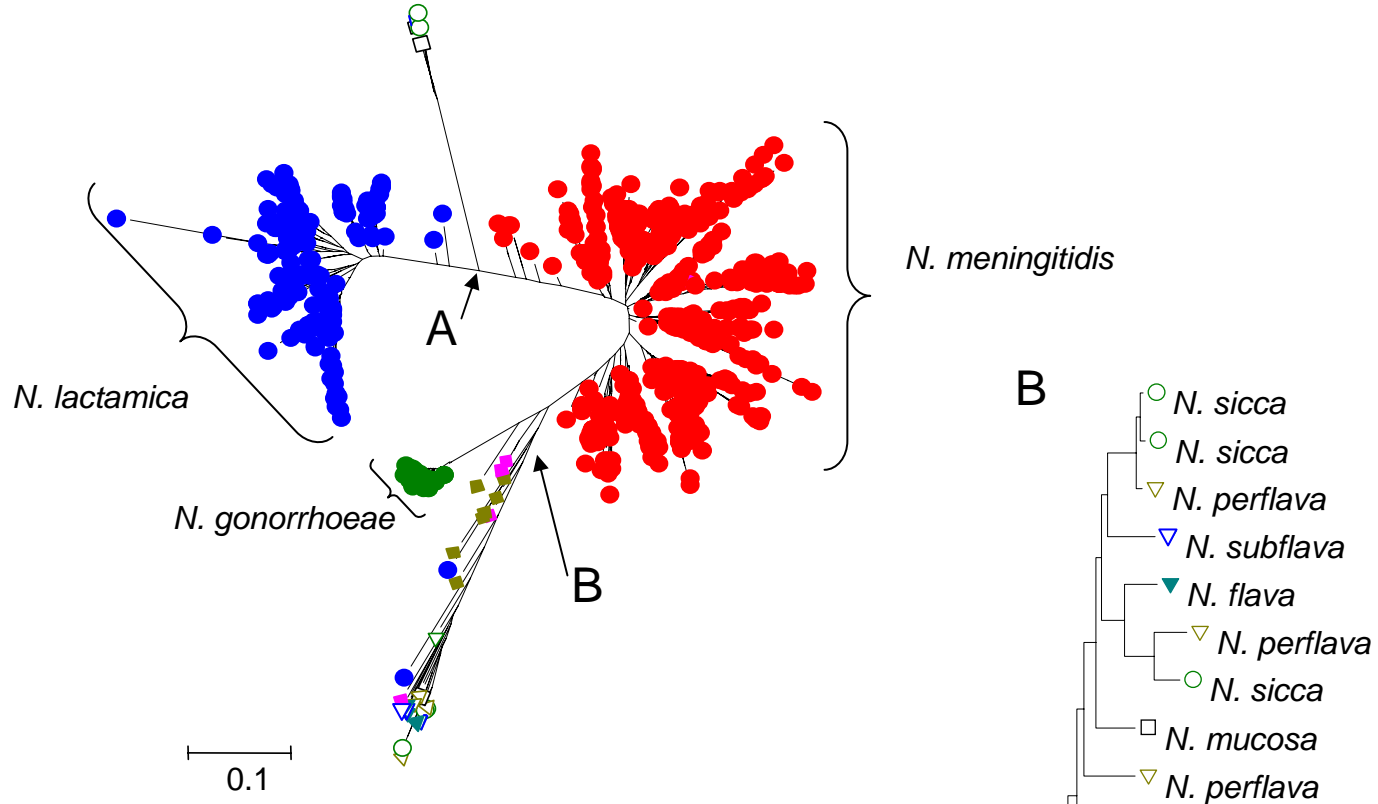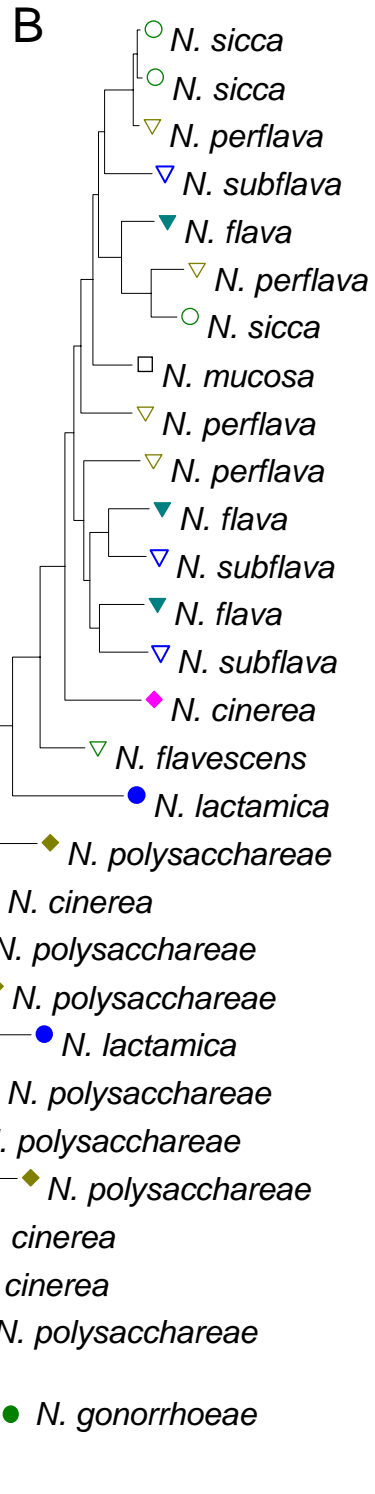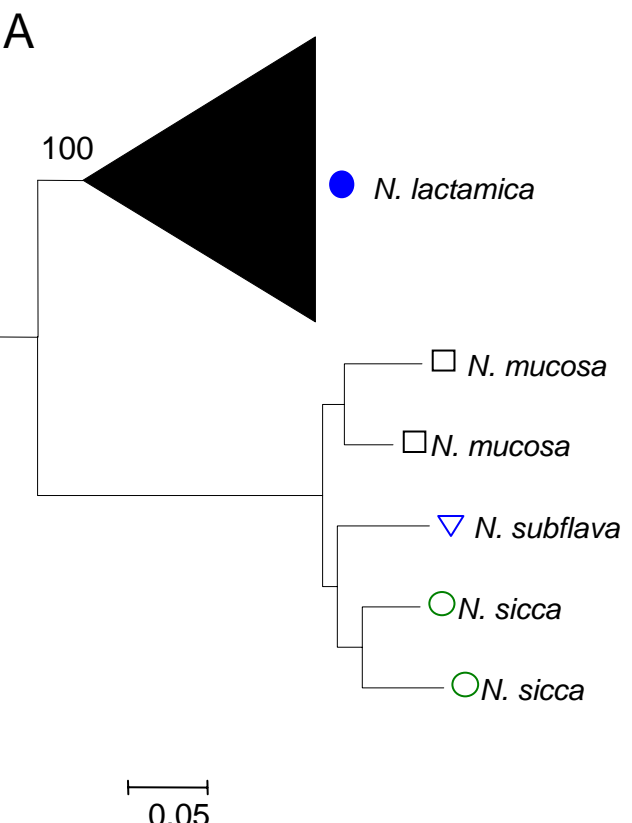

Supplement: 12915_2005_34_MOESM1_ESM.pdf [file 12915_2005_34_MOESM1_ESM.pdf]
